# Supplementary material
Source: PubMed Central journal article supplement (PMC7029791)
Supplement: NIHMS971166-supplement-1.pdf [file NIHMS971166-supplement-1.pdf]

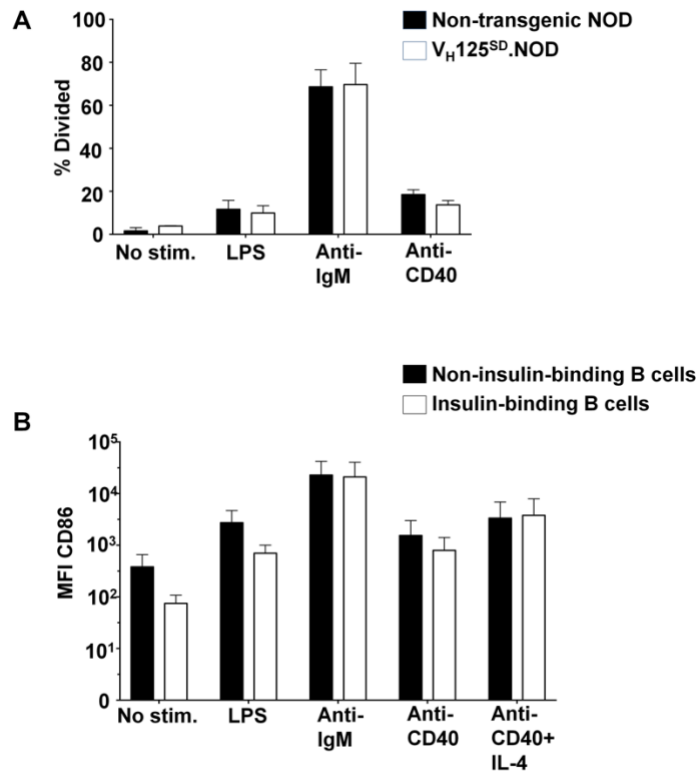

1 **Supplemental Fig. 1. B cell responses to mitogens are not impaired by the presence of the VDJH**  
 2 **targeted transgene.**

3 Splenocytes from non-transgenic NOD or V<sub>H</sub>125<sup>SD</sup>.NOD mice were cultured with LPS, anti-IgM, or anti-  
 4 CD40, and proliferation was assessed using CellTrace™ Violet labeling. (A) Summary of proliferative  
 5 responses for non-transgenic NOD (black bars) and V<sub>H</sub>125<sup>SD</sup>.NOD (open bars) mice after 48h. Mean  
 6 percentage of dividing, live B220+CD19+ cells is shown (n=3 for each genotype, error bars denote SD, *p*  
 7 = 0.5, paired two-tailed t test). (B) Summary of CD86 MFI for non-insulin-binding (black bars) and  
 8 insulin-binding (open bars) B cells in V<sub>H</sub>125<sup>SD</sup>.NOD mice after culture with LPS, anti-IgM, anti-CD40,  
 9 or anti-CD40 and IL-4. Cells were gated on B220+CD19+ live lymphocytes. Histogram represents the  
 10 mean of a minimum of three mice from five total experiments. Error bars denote SD.

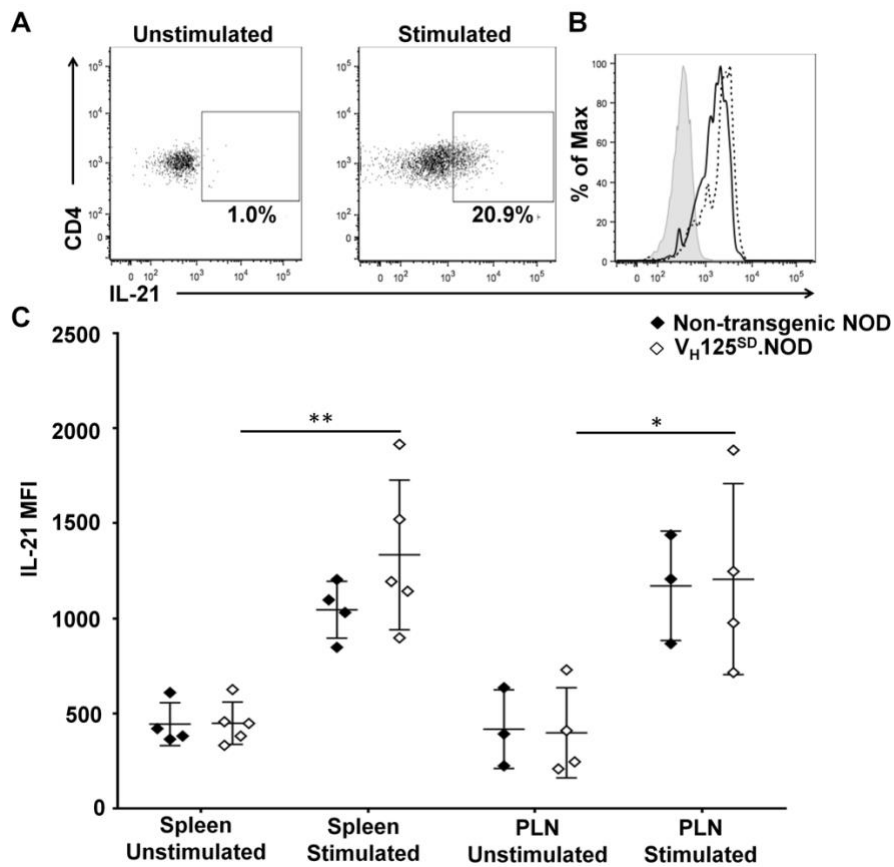

11 **Supplemental Fig. 2. IL-21 production is comparable between non-transgenic NOD and**  
 12 **V<sub>H</sub>125<sup>SD</sup>.NOD mice.**

13 Splenocytes from V<sub>H</sub>125<sup>SD</sup>.NOD or non-transgenic NOD mice were cultured with or without  
 14 anti-CD3 and soluble anti-CD28 prior to intracellular cytokine staining for IL-21. (A)

15 Representative dot plot of IL-21+ CD4 T cells from V<sub>H</sub>125<sup>SD</sup>.NOD mice without stimulation  
 16 (left panel) and after stimulation with anti-CD3/anti-CD28 (right panel). Cells are gated on

17 CD4+ live lymphocytes. (B) Comparison of IL-21 production by Non-transgenic (solid line) and  
 18 V<sub>H</sub>125<sup>SD</sup>.NOD (dotted line) CD4 T cells compared to unstimulated V<sub>H</sub>125<sup>SD</sup>.NOD (tinted gray)  
 19 CD4 T cells. Histogram is representative of  $\geq 3$  mice for each genotype. (C) Summary of IL-21

20 MFI for CD4 T cells from the spleen and PLNs of non-transgenic NOD (closed diamonds) and  
 21 V<sub>H</sub>125<sup>SD</sup>.NOD (open diamonds) mice. Each point represents an individual mouse. \*\* $p < 0.01$ ,

22 \* $p < 0.05$ , one-way ANOVA with Tukey's multiple comparisons test.
